# Supplementary material
Source: PubMed Central journal article supplement (PMC8371778)
Supplement: 13054_2021_3720_MOESM1_ESM.pdf [file 13054_2021_3720_MOESM1_ESM.pdf]

## Supplemental data

### Machine Learning Identifies and Weighs Risk Factors Predicting Outcome in COVID-19 ICU Patients.

|                                                                                                                                                                                                            |    |
|------------------------------------------------------------------------------------------------------------------------------------------------------------------------------------------------------------|----|
| Supplemental Table E1: Table showing level of care at participating centers .....                                                                                                                          | 3  |
| Supplemental Table E2: Conversion table used to estimate FiO <sub>2</sub> in patients breathing spontaneously with supplemental oxygen.....                                                                | 6  |
| Supplemental Table E3: Descriptive statistics of outlier data excluded .....                                                                                                                               | 7  |
| Supplemental Table E4: Clinical characteristics of retrospective (N=713) and prospective (N=475) patient cohort included in the study; therapeutic interventions, clinical and laboratory parameters ..... | 8  |
| Supplemental Table E5: Clinical characteristics of patients who chose to discontinue ICU care; therapeutic interventions, clinical and laboratory parameters .....                                         | 14 |
| Supplemental Table E6: Respiratory therapy and organ failure support in ICU patients.....                                                                                                                  | 18 |
| Supplemental Table E7: Description of the machine learning process.....                                                                                                                                    | 20 |
| Variables excluded from the ML process due to more than 30% missing data .....                                                                                                                             | 20 |
| Supplemental Table E8: Variables used for the ML models .....                                                                                                                                              | 21 |
| Supplemental Table E9: Overall performance of the machine learning models for ICU outcome prediction.....                                                                                                  | 23 |
| Supplemental Figure E1: Map illustrating location of participating centers in Germany.....                                                                                                                 | 24 |
| Supplemental Figure E2: Patient selection chart.....                                                                                                                                                       | 25 |
| Supplemental Figure E3: Kaplan Meier Curves for probability of ICU survival .....                                                                                                                          | 26 |
| Supplemental Figure E4: PR-AUC curve for the EBM models (complete dataset) .....                                                                                                                           | 27 |

Supplemental Figure E5: Comparison of shape functions of 5 selected variables of the EBM model for the prediction of “ICU survival” using the different datasets out of the 20 most important variables .....29

References .....33

**Supplemental Table E1: Table showing level of care at participating centers**

| <b>Hospital</b>                                                                                                                                             | <b>Participating Department</b>                                               |
|-------------------------------------------------------------------------------------------------------------------------------------------------------------|-------------------------------------------------------------------------------|
| <b>Tertiary Care University Hospitals</b>                                                                                                                   |                                                                               |
| University Hospital RWTH Aachen, Aachen                                                                                                                     | Department of Intensive Care Medicine                                         |
| Charité - Universitätsmedizin Berlin, corporate member of Freie Universität Berlin, Humboldt-Universität zu Berlin, and Berlin Institute of Health, Germany | Department of Anesthesiology and Operative Intensive Care Medicine (CCM, CVK) |
| Knappschaftskrankenhaus Bochum, Bochum                                                                                                                      | Department of Anesthesiology/Intensive Care Medicine/Pain Therapy             |
| University Hospital Bonn, Bonn                                                                                                                              | Department of Anaesthesiology and Intensive Care Medicine                     |
| University Hospital Carl Gustav Carus, Technische Universität Dresden, Dresden                                                                              | Department of Anesthesiology and Intensive Care Medicine                      |
| University Hospital Düsseldorf, Düsseldorf                                                                                                                  | Department of Anaesthesiology                                                 |
| University Hospital Essen, Essen                                                                                                                            | Department of Anesthesiology and Intensive Care Medicine                      |
| University Hospital Frankfurt, Goethe University, Frankfurt                                                                                                 | Department of Anaesthesiology, Intensive Care Medicine and Pain Therapy       |
| Medical Center - University of Freiburg, Freiburg                                                                                                           | Department of Anesthesiology and Critical Care                                |
| University of Göttingen, Göttingen                                                                                                                          | Center for Anesthesiology, Emergency and Intensive Care Medicine              |

|                                                                                              |                                                                            |
|----------------------------------------------------------------------------------------------|----------------------------------------------------------------------------|
| University Medicine Greifswald,<br>Greifswald                                                | Department of Anesthesiology                                               |
| University Hospital Halle (Saale), Halle<br>(Saale)                                          | Cardiology, Angiology and Intensive Care<br>Medicine                       |
| Heidelberg University Hospital, Heidelberg                                                   | Department of Anesthesiology                                               |
| Leipzig University Hospital, Leipzig                                                         | Department of Anesthesiology and<br>Intensive Care                         |
| University Medical Center Schleswig-<br>Holstein, Campus Lübeck and University of<br>Lübeck  | Department of Anesthesiology and<br>Intensive Care                         |
| Otto-von-Guericke-University Magdeburg,<br>Magdeburg                                         | Department of Anaesthesiology and<br>Intensive Care Therapy                |
| University Hospital Giessen and Marburg,<br>and Philipps University Marburg, Marburg         | Department of Anesthesiology and<br>Intensive Care Medicine                |
| University Hospital Giessen and Marburg,<br>and Justus-Liebig University Giessen,<br>Giessen | Department of Anesthesiology, Intensive<br>Care Medicine and Pain Therapy  |
| Klinikum rechts der Isar, Technical<br>University of Munich                                  | Department of Anesthesiology and<br>Intensive Care                         |
| Saarland University Hospital Medical<br>Center, Homburg/Saar                                 | Department of Anesthesiology, Intensive<br>Care Medicine and Pain Medicine |
| University Hospital Tübingen, Eberhard-<br>Karls-University Tübingen, Tübingen               | Department of Anaesthesiology and<br>Intensive Care Medicine               |
| Ulm University, Ulm                                                                          | Department of Anesthesiology and<br>Intensive Care Medicine                |

|                                                                       |                                                                               |
|-----------------------------------------------------------------------|-------------------------------------------------------------------------------|
| Cologne-Merheim Medical Centre,<br>Witten/Herdecke University         | Department of Anaesthesiology and<br>Intensive Care Medicine                  |
| University Hospitals of Würzburg,<br>University of Würzburg, Würzburg | Department of Anaesthesiology, Intensive<br>Care, Emergency and Pain Medicine |

|                                                 |                                                                                                    |
|-------------------------------------------------|----------------------------------------------------------------------------------------------------|
| <b>Primary and Secondary Care Hospitals</b>     |                                                                                                    |
| Zollernalb Klinikum, Balingen                   | Center for Anaesthesia, Intensive Care and<br>Emergency Medicine                                   |
| Evangelisches Krankenhaus Bethesda,<br>Duisburg | Department of Anesthesiology and<br>Intensive Care Medicine                                        |
| St. Elisabethen Klinikum, Ravensburg.           | Department for Anesthesiology, Intensive<br>Care Medicine, Emergency Medicine and<br>Pain Medicine |

### **Enrolling centers**

Retrospective study            n=27

Prospective study            n=10

**Supplemental Table E2: Conversion table used to estimate FiO<sub>2</sub> in patients breathing spontaneously with supplemental oxygen**

| Oxygen Delivery Method and delivered O <sub>2</sub> | Estimated F <sub>i</sub> O <sub>2</sub> |
|-----------------------------------------------------|-----------------------------------------|
| <i>Nasal cannula O<sub>2</sub></i>                  |                                         |
| 2                                                   | 0.28                                    |
| 3                                                   | 0.32                                    |
| 4                                                   | 0.36                                    |
| 5                                                   | 0.40                                    |
| 6                                                   | 0.44                                    |
| <i>Simple Face Mask O<sub>2</sub></i>               |                                         |
| 5                                                   | 0.40                                    |
| 6-7                                                 | 0.50                                    |
| 7-8                                                 | 0.60                                    |
| <i>Non Re-Breather Face-Mask O<sub>2</sub></i>      |                                         |
| 6                                                   | 0.60                                    |
| 7                                                   | 0.70                                    |
| 8                                                   | 0.80                                    |
| 9                                                   | 0.90                                    |
| 10                                                  | 0.95                                    |

Reference: The Extended Study of Prevalence of Infection in Intensive Care (EPIC II) study.

**Supplemental Table E3: Descriptive statistics of outlier data excluded**

| Parameter                                   | Range accepted | Excluded data points (n)    |                           |
|---------------------------------------------|----------------|-----------------------------|---------------------------|
|                                             |                | <i>Retrospective cohort</i> | <i>Prospective cohort</i> |
| Lymphocytes (n/nl)                          | 0.1 to 50      | 26                          | 51                        |
| Neutrophils (n/nl)                          | 0.18 to 60     | 9                           | 21                        |
| Leucocytes (n/nl)                           | 1 to 100       | 3                           | 3                         |
| Hemoglobin (g/dl)                           | 5 to 20        | 0                           | 6                         |
| Creatinine (mg/dl)                          | 0 to 12        | 0                           | 4                         |
| CRP (mg/dl)                                 | 0.01 to 80     | 1                           | 0                         |
| Static compliance<br>(ml/mbar)              | 0 to 100       | 11                          | 6                         |
| PaO <sub>2</sub> /FiO <sub>2</sub> Quotient | 0 to 500       | 4                           | 5                         |
| Driving Pressure<br>(mbar)                  | 0 to 30        | 3                           | 0                         |

**Supplemental Table E4: Clinical characteristics of retrospective (N=713) and prospective (N=475) patient cohort included in the study; therapeutic interventions, clinical and laboratory parameters**

| Parameter                | Retrospective cohort |           |                              |                              |                              | Prospective cohort |           |                              |                              |                              |
|--------------------------|----------------------|-----------|------------------------------|------------------------------|------------------------------|--------------------|-----------|------------------------------|------------------------------|------------------------------|
|                          | Total N              | Missing N | non-survival                 | survival                     | total                        | Total N            | Missing N | non-survival                 | survival                     | total                        |
| Total N (%)              |                      |           | 214<br>(30.0)                | 499<br>(70.0)                | 713                          |                    |           | 189<br>(39,8)                | 286<br>(60.2)                | 475                          |
| Age (years)              | 713                  | 0         | 68.0<br>(58.0<br>to<br>76.0) | 62.0<br>(53.0<br>to<br>72.0) | 63.0<br>(54.0<br>to<br>74.0) | 475                | 0         | 66.0<br>(58.0<br>to<br>73.0) | 62.0<br>(53.0<br>to<br>71.0) | 64.0<br>(54.0<br>to<br>72.5) |
| Age groups               | 713                  | 0         |                              |                              |                              | 475                | 0         |                              |                              |                              |
| 18 – 29 years            |                      |           | 2 (0.9)                      | 14<br>(2.8)                  | 16<br>(2.2)                  |                    |           | 0 (0.0)                      | 12<br>(4.2)                  | 12<br>(2.5)                  |
| 30 – 39 years            |                      |           | 3 (1.4)                      | 26<br>(5.2)                  | 29<br>(4.1)                  |                    |           | 5 (2.6)                      | 11<br>(3.8)                  | 16<br>(3.4)                  |
| 40 – 49 years            |                      |           | 14<br>(6.5)                  | 50<br>(10.0)                 | 64<br>(9.0)                  |                    |           | 18<br>(9.5)                  | 25<br>(8.7)                  | 43<br>(9.1)                  |
| 50 – 59 years            |                      |           | 42<br>(19.6)                 | 125<br>(25.1)                | 167<br>(23.4)                |                    |           | 33<br>(17.5)                 | 71<br>(24.8)                 | 104<br>(21.9)                |
| 60 – 69 years            |                      |           | 62<br>(29.0)                 | 127<br>(25.5)                | 189<br>(26.5)                |                    |           | 68<br>(36.0)                 | 75<br>(26.2)                 | 143<br>(30.1)                |
| 70 – 79 years            |                      |           | 56<br>(26.2)                 | 114<br>(22.8)                | 170<br>(23.8)                |                    |           | 49<br>(25.9)                 | 75<br>(26.2)                 | 124<br>(26.1)                |
| 80 – 89 years            |                      |           | 34<br>(15.9)                 | 40<br>(8.0)                  | 74<br>(10.4)                 |                    |           | 14<br>(7.4)                  | 17<br>(5.9)                  | 31<br>(6.5)                  |
| > 90 years               |                      |           | 1 (0.5)                      | 3 (0.6)                      | 4<br>(0.6)                   |                    |           | 2 (1.1)                      | 0 (0.0)                      | 2<br>(0.4)                   |
| Sex                      | 713                  | 0         |                              |                              |                              | 475                | 0         |                              |                              |                              |
| female                   |                      |           | 39<br>(18.2)                 | 149<br>(29.9)                | 188<br>(26.4)                |                    |           | 53<br>(28.0)                 | 92<br>(32.2)                 | 145<br>(30.5)                |
| male                     |                      |           | 175<br>(81.8)                | 350<br>(70.1)                | 525<br>(73.6)                |                    |           | 136<br>(72.0)                | 194<br>(67.8)                | 330<br>(69.5)                |
| BMI (kg/m <sup>2</sup> ) | 660                  | 53        | 28.0<br>(24.9<br>to<br>33.9) | 28.3<br>(25.4<br>to<br>32.7) | 28.2<br>(25.2<br>to<br>33.1) | 462                | 13        | 28.4<br>(25.4<br>to<br>32.7) | 28.4<br>(24.9<br>to<br>32.7) | 28.4<br>(25.1<br>to<br>32.7) |
| BMI groups               | 660                  | 53        |                              |                              |                              | 462                | 13        |                              |                              |                              |



|                                                     |     |     |            |            |            |     |     |            |            |            |
|-----------------------------------------------------|-----|-----|------------|------------|------------|-----|-----|------------|------------|------------|
| below 20 kg/m <sup>2</sup>                          |     |     | 2 (1.0)    | 9 (2.0)    | 11 (1.7)   |     |     | 6 (3.3)    | 7 (2.5)    | 13 (2.8)   |
| 20 – 25 kg/m <sup>2</sup>                           |     |     | 50 (24.6)  | 102 (22.3) | 152 (23.0) |     |     | 38 (20.8)  | 63 (22.6)  | 101 (21.9) |
| 25 – 30 kg/m <sup>2</sup>                           |     |     | 75 (36.9)  | 170 (37.2) | 245 (37.1) |     |     | 66 (36.1)  | 97 (34.8)  | 163 (35.3) |
| above 30 kg/m <sup>2</sup>                          |     |     | 76 (37.4)  | 176 (38.5) | 252 (38.2) |     |     | 73 (39.9)  | 112 (40.1) | 185 (40.0) |
| Bloodgroup                                          | 435 | 278 |            |            |            | 321 | 154 |            |            |            |
| 0                                                   |     |     | 62 (40.0)  | 94 (33.6)  | 156 (35.9) |     |     | 59 (40.4)  | 64 (36.6)  | 123 (38.3) |
| A                                                   |     |     | 63 (40.6)  | 141 (50.4) | 204 (46.9) |     |     | 61 (41.8)  | 72 (41.1)  | 133 (41.4) |
| AB                                                  |     |     | 4 (2.6)    | 13 (4.6)   | 17 (3.9)   |     |     | 6 (4.1)    | 12 (6.9)   | 18 (5.6)   |
| B                                                   |     |     | 26 (16.8)  | 32 (11.4)  | 58 (13.3)  |     |     | 20 (13.7)  | 27 (15.4)  | 47 (14.6)  |
| <b>Past medical history and chronic medications</b> |     |     |            |            |            |     |     |            |            |            |
| Arterial hypertension                               | 713 | 0   | 144 (67.3) | 314 (62.9) | 458 (64.2) | 475 | 0   | 111 (58.7) | 167 (58.4) | 278 (58.5) |
| Cardiovascular disease                              | 713 | 0   | 79 (36.9)  | 120 (24.0) | 199 (27.9) | 475 | 0   | 45 (23.8)  | 68 (23.8)  | 113 (23.8) |
| Chronic arrhythmia                                  | 713 | 0   | 37 (17.3)  | 51 (10.2)  | 88 (12.3)  | 475 | 0   | 24 (12.7)  | 34 (11.9)  | 58 (12.2)  |
| COPD                                                | 713 | 0   | 19 (8.9)   | 42 (8.4)   | 61 (8.6)   | 475 | 0   | 19 (10.1)  | 27 (9.4)   | 46 (9.7)   |
| Other lung disease                                  | 713 | 0   | 23 (10.7)  | 52 (10.4)  | 75 (10.5)  | 475 | 0   | 21 (11.1)  | 28 (9.8)   | 49 (10.3)  |
| Nicotine abuse                                      | 713 | 0   | 22 (10.3)  | 43 (8.6)   | 65 (9.1)   | 475 | 0   | 14 (7.4)   | 35 (12.2)  | 49 (10.3)  |
| History of solid organ transplant                   | 713 | 0   | 3 (1.4)    | 5 (1.0)    | 8 (1.1)    | 475 | 0   | 6 (3.2)    | 9 (3.1)    | 15 (3.2)   |
| History of bone marrow transplant                   | 713 | 0   | 2 (0.9)    | 2 (0.4)    | 4 (0.6)    | 475 | 0   | 1 (0.5)    | 3 (1.0)    | 4 (0.8)    |
| Alcoholism                                          | 713 | 0   | 5 (2.3)    | 11 (2.2)   | 16 (2.2)   | 475 | 0   | 8 (4.2)    | 12 (4.2)   | 20 (4.2)   |

|                                      |     |   |               |               |               |     |   |              |               |               |
|--------------------------------------|-----|---|---------------|---------------|---------------|-----|---|--------------|---------------|---------------|
| Chronic kidney failure               | 713 | 0 | 33<br>(15.4)  | 66<br>(13.2)  | 99<br>(13.9)  | 475 | 0 | 20<br>(10.6) | 27<br>(9.4)   | 47<br>(9.9)   |
| Diabetes mellitus                    | 713 | 0 | 58<br>(27.1)  | 131<br>(26.3) | 189<br>(26.5) | 475 | 0 | 68<br>(36.0) | 88<br>(30.8)  | 156<br>(32.8) |
| NIDDM                                | 713 | 0 | 42<br>(19.6)  | 83<br>(16.6)  | 125<br>(17.5) | 475 | 0 | 46<br>(24.3) | 50<br>(17.5)  | 96<br>(20.2)  |
| Prior thrombotic events <sup>1</sup> | 713 | 0 | 9 (4.2)       | 23<br>(4.6)   | 32<br>(4.5)   | 475 | 0 | 15<br>(7.9)  | 12<br>(4.2)   | 27<br>(5.7)   |
| ACE inhibitors                       | 713 | 0 | 46<br>(21.5)  | 84<br>(16.8)  | 130<br>(18.2) | 475 | 0 | 49<br>(25.9) | 89<br>(31.1)  | 138<br>(29.1) |
| AT2 receptor blocker                 | 713 | 0 | 25<br>(11.7)  | 81<br>(16.2)  | 106<br>(14.9) | 475 | 0 | 22<br>(11.6) | 37<br>(12.9)  | 59<br>(12.4)  |
| Beta blockers                        | 713 | 0 | 66<br>(30.8)  | 140<br>(28.1) | 206<br>(28.9) | 475 | 0 | 50<br>(26.5) | 88<br>(30.8)  | 138<br>(29.1) |
| Anti-platelet medication             | 713 | 0 | 56<br>(26.2)  | 100<br>(20.0) | 156<br>(21.9) | 475 | 0 | 39<br>(20.6) | 65<br>(22.7)  | 104<br>(21.9) |
| NOAC                                 | 713 | 0 | 11<br>(5.1)   | 31<br>(6.2)   | 42<br>(5.9)   | 475 | 0 | 18<br>(9.5)  | 26<br>(9.1)   | 44<br>(9.3)   |
| Corticosteroids                      | 713 | 0 | 26<br>(12.1)  | 31<br>(6.2)   | 57<br>(8.0)   | 475 | 0 | 18<br>(9.5)  | 32<br>(11.2)  | 50<br>(10.5)  |
| Immunosuppressive drugs              | 713 | 0 | 9 (4.2)       | 15<br>(3.0)   | 24<br>(3.4)   | 475 | 0 | 12<br>(6.3)  | 16<br>(5.6)   | 28<br>(5.9)   |
| Opioids                              | 713 | 0 | 8 (3.7)       | 21<br>(4.2)   | 29<br>(4.1)   | 475 | 0 | 11<br>(5.8)  | 17<br>(5.9)   | 28<br>(5.9)   |
| <b>Status at ICU admission</b>       |     |   |               |               |               |     |   |              |               |               |
| Admission/Transfer status            | 713 | 0 |               |               |               | 475 | 0 |              |               |               |
| External transfer                    |     |   | 111<br>(51.9) | 249<br>(49.9) | 360<br>(50.5) |     |   | 95<br>(50.3) | 87<br>(30.4)  | 182<br>(38.3) |
| Internal or direct admission         |     |   | 103<br>(48.1) | 250<br>(50.1) | 353<br>(49.5) |     |   | 94<br>(49.7) | 199<br>(69.6) | 293<br>(61.7) |
| Ventilatory status at admission      | 713 | 0 |               |               |               | 475 | 0 |              |               |               |
| intubated                            |     |   | 122<br>(57.0) | 202<br>(40.5) | 324<br>(45.4) |     |   | 95<br>(50.3) | 76<br>(26.6)  | 171<br>(36.0) |

|                                                                       |     |     |                        |                        |                        |     |     |                        |                        |                        |
|-----------------------------------------------------------------------|-----|-----|------------------------|------------------------|------------------------|-----|-----|------------------------|------------------------|------------------------|
| non-invasive assisted ventilation                                     |     |     | 19<br>(8.9)            | 55<br>(11.0)           | 74<br>(10.4)           |     |     | 21<br>(11.1)           | 37<br>(12.9)           | 58<br>(12.2)           |
| spontaneous breathing                                                 |     |     | 73<br>(34.1)           | 242<br>(48.5)          | 315<br>(44.2)          |     |     | 73<br>(38.6)           | 173<br>(60.5)          | 246<br>(51.8)          |
| Prior days of non-invasive ventilation                                | 575 | 138 | 0.0<br>(0.0 to 0.0)    | 0.0<br>(0.0 to 0.0)    | 0.0<br>(0.0 to 0.0)    | 442 | 33  | 0.0<br>(0.0 to 2.0)    | 0.0<br>(0.0 to 0.0)    | 0.0<br>(0.0 to 1.0)    |
| Days prior invasive ventilation                                       | 644 | 69  | 0.0<br>(0.0 to 4.0)    | 0.0<br>(0.0 to 1.0)    | 0.0<br>(0.0 to 2.0)    | 457 | 18  | 0.0<br>(0.0 to 1.0)    | 0.0<br>(0.0 to 0.0)    | 0.0<br>(0.0 to 1.0)    |
| RASS                                                                  | 654 | 59  | -3 (-5 to 0)           | 0 (-4 to 0)            | -1 (-4 to 0)           | 448 | 27  | -1 (-5 to 0)           | 0 (-2 to 0)            | 0 (-5 to 0)            |
| SOFA (w/o GCS)                                                        | 713 | 0   | 7 (5 to 10)            | 5 (3 to 7)             | 6 (4 to 8)             | 475 | 0   | 6 (4 to 8)             | 4 (3 to 6)             | 4 (3 to 7)             |
| Murray Lung Injury Score                                              | 697 | 16  | 3.0<br>(2.5 to 3.5)    | 3.0<br>(2.3 to 3.5)    | 3.0<br>(2.5 to 3.5)    | 461 | 14  | 3.5<br>(3.0 to 3.6)    | 3.0<br>(2.1 to 3.5)    | 3.0<br>(2.5 to 3.5)    |
| ARDS grading according to PaO <sub>2</sub> /FiO <sub>2</sub> quotient | 705 | 8   |                        |                        |                        | 454 | 21  |                        |                        |                        |
| Mild (PaO <sub>2</sub> /FiO <sub>2</sub> 201 to 300)                  |     |     | 21<br>(9.9)            | 96<br>(19.6)           | 117<br>(16.7)          |     |     | 24<br>(13.0)           | 52<br>(19.3)           | 76<br>(16.7)           |
| Moderate (PaO <sub>2</sub> /FiO <sub>2</sub> 101 to 200)              |     |     | 108<br>(50.9)          | 234<br>(47.8)          | 342<br>(48.7)          |     |     | 81<br>(43.8)           | 124<br>(46.1)          | 205<br>(45.2)          |
| Severe (PaO <sub>2</sub> /FiO <sub>2</sub> ≤ 100)                     |     |     | 73<br>(34.4)           | 116<br>(23.7)          | 189<br>(26.9)          |     |     | 69<br>(37.3)           | 70<br>(26.0)           | 139<br>(30.6)          |
| no ARDS                                                               |     |     | 10<br>(4.7)            | 44<br>(9.0)            | 54<br>(7.7)            |     |     | 11<br>(5.9)            | 23<br>(8.6)            | 34<br>(7.5)            |
| Static compliance (ml/mbar) <sup>2</sup>                              | 411 | 302 | 36.5<br>(27.5 to 47.7) | 38.7<br>(30.0 to 50.0) | 37.8<br>(29.0 to 49.9) | 201 | 274 | 31.7<br>(23.0 to 40.0) | 35.2<br>(28.1 to 46.0) | 33.3<br>(24.4 to 41.8) |
| Driving pressure (mbar) <sup>2</sup>                                  | 422 | 291 | 13.0<br>(10.0 to 16.0) | 12.0<br>(10.0 to 15.0) | 13.0<br>(10.0 to 15.0) | 214 | 261 | 13.0<br>(10.0 to 16.0) | 12.0<br>(10.0 to 15.0) | 12.0<br>(10.0 to 15.0) |
| Hemoglobin (g/dl)                                                     | 709 | 4   | 11.4<br>(9.7 to 13.0)  | 11.7<br>(9.9 to 13.1)  | 11.6<br>(9.8 to 13.1)  | 472 | 3   | 10.6<br>(9.4 to 12.6)  | 12.4<br>(10.5 to 13.7) | 11.6<br>(10.0 to 13.3) |

|                                      |     |     |                                 |                                 |                                          |     |     |                                 |                                 |                                          |
|--------------------------------------|-----|-----|---------------------------------|---------------------------------|------------------------------------------|-----|-----|---------------------------------|---------------------------------|------------------------------------------|
| Platelets<br>(x10 <sup>3</sup> µl-1) | 710 | 3   | 199.0<br>(146.0<br>to<br>273.0) | 230.0<br>(177.0<br>to<br>313.0) | 223.<br>0<br>(166.<br>0 to<br>299.<br>0) | 470 | 5   | 207.5<br>(147.0<br>to<br>287.2) | 239.0<br>(177.0<br>to<br>321.0) | 226.<br>5<br>(163.<br>0 to<br>310.<br>2) |
| Leucocytes<br>(n/nl)                 | 710 | 3   | 10.2<br>(6.7 to<br>13.5)        | 8.7<br>(5.9 to<br>11.8)         | 9.0<br>(6.2<br>to<br>12.5)               | 472 | 3   | 11.1<br>(8.0 to<br>16.2)        | 9.2<br>(6.4 to<br>12.4)         | 10.0<br>(6.8<br>to<br>14.1)              |
| Lymphocytes<br>(n/nl)                | 612 | 101 | 0.8<br>(0.4 to<br>1.1)          | 0.8<br>(0.6 to<br>1.2)          | 0.8<br>(0.6<br>to<br>1.2)                | 365 | 110 | 0.7<br>(0.4 to<br>1.2)          | 0.8<br>(0.5 to<br>1.2)          | 0.8<br>(0.5<br>to<br>1.2)                |
| Neutrophiles<br>(n/nl)               | 544 | 169 | 8.2<br>(5.0 to<br>11.5)         | 6.5<br>(4.4 to<br>9.1)          | 7.0<br>(4.7<br>to<br>9.9)                | 349 | 126 | 9.4<br>(6.4 to<br>14.2)         | 7.3<br>(4.7 to<br>10.0)         | 8.0<br>(5.3<br>to<br>11.5)               |
| Platelet/neutrophile ratio           | 542 | 171 | 24.4<br>(17.4<br>to<br>37.3)    | 34.4<br>(25.2<br>to<br>55.3)    | 32.4<br>(22.7<br>to<br>50.7)             | 347 | 128 | 21.5<br>(12.2<br>to<br>34.2)    | 34.3<br>(23.1<br>to<br>49.9)    | 28.7<br>(18.0<br>to<br>43.7)             |
| Platelet/lymphocyte ratio            | 609 | 104 | 285.5<br>(168.4<br>to<br>436.4) | 279.4<br>(184.2<br>to<br>425.9) | 280.<br>8<br>(178.<br>9 to<br>432.<br>3) | 362 | 113 | 256.4<br>(139.4<br>to<br>503.8) | 285.7<br>(178.8<br>to<br>434.8) | 280.<br>5<br>(168.<br>3 to<br>470.<br>7) |
| C-reactive protein (mg/dl)           | 697 | 16  | 18.2<br>(10.4<br>to<br>30.4)    | 15.0<br>(8.9 to<br>23.6)        | 16.0<br>(9.4<br>to<br>26.6)              | 445 | 30  | 15.6<br>(8.5 to<br>23.9)        | 12.2<br>(5.8 to<br>20.1)        | 13.3<br>(6.6<br>to<br>22.0)              |
| Procalcitonin (ng/ml)                | 688 | 25  | 1.0<br>(0.3 to<br>2.9)          | 0.4<br>(0.1 to<br>1.1)          | 0.5<br>(0.2<br>to<br>1.6)                | 467 | 8   | 0.6<br>(0.2 to<br>1.7)          | 0.2<br>(0.1 to<br>0.7)          | 0.3<br>(0.1<br>to<br>1.1)                |
| Interleukin-6 (pg/ml)                | 527 | 186 | 206.0<br>(84.6<br>to<br>571.2)  | 98.4<br>(45.0<br>to<br>226.5)   | 120.<br>0<br>(54.1<br>to<br>335.<br>0)   | 325 | 150 | 111.0<br>(50.4<br>to<br>295.8)  | 61.4<br>(25.0<br>to<br>127.0)   | 82.2<br>(32.9<br>to<br>187.<br>0)        |
| Ferritin (µg/dl)                     | 449 | 264 | 161.8<br>(94.4<br>to<br>304.5)  | 121.3<br>(57.1<br>to<br>201.0)  | 129.<br>4<br>(68.7<br>to<br>216.<br>6)   | 174 | 301 | 138.5<br>(82.3<br>to<br>249.4)  | 100.6<br>(60.6<br>to<br>157.8)  | 115.<br>0<br>(69.5<br>to<br>184.<br>9)   |
| D-Dimer (µg/ml)                      | 558 | 155 | 4.0<br>(1.5 to<br>11.0)         | 2.5<br>(1.2 to<br>5.1)          | 2.8<br>(1.3<br>to<br>6.6)                | 348 | 127 | 5.4<br>(1.9 to<br>18.9)         | 1.7<br>(0.9 to<br>4.7)          | 2.9<br>(1.2<br>to<br>10.6)               |
| Total bilirubin (mg/dl)              | 700 | 13  | 0.7<br>(0.4 to<br>1.2)          | 0.6<br>(0.4 to<br>0.9)          | 0.6<br>(0.4<br>to<br>1.0)                | 462 | 13  | 0.7<br>(0.4 to<br>1.1)          | 0.5<br>(0.3 to<br>0.7)          | 0.6<br>(0.4<br>to<br>0.8)                |

|                      |               |     |                       |                       |                       |               |   |                        |                       |                       |
|----------------------|---------------|-----|-----------------------|-----------------------|-----------------------|---------------|---|------------------------|-----------------------|-----------------------|
| Creatinine (mg/dl)   | 713           | 0   | 1.4<br>(1.0 to 2.5)   | 1.0<br>(0.7 to 1.4)   | 1.1<br>(0.8 to 1.7)   | 467           | 8 | 1.1<br>(0.7 to 1.8)    | 0.9<br>(0.8 to 1.3)   | 1.0<br>(0.8 to 1.5)   |
| <b>ICU outcomes</b>  |               |     |                       |                       |                       |               |   |                        |                       |                       |
| Mortality n/%        | 214<br>(30.0) |     |                       |                       |                       | 186<br>(39.4) |   |                        |                       |                       |
| LOS ICU (days)       | 713           | 0   | 13.0<br>(6.2 to 25.0) | 18.0<br>(8.0 to 37.0) | 17.0<br>(7.0 to 33.0) | 475           | 0 | 15.0<br>(10.0 to 23.0) | 12.0<br>(5.0 to 27.0) | 14.0<br>(7.0 to 25.5) |
| Transfer destination | 518           | 195 |                       |                       |                       | 472           | 3 |                        |                       |                       |
| intermediate care    |               |     | na                    | 36<br>(7.3)           | na                    |               |   | na                     | 15<br>(5.3)           | 15<br>(3.2)           |
| normal ward          |               |     | na                    | 282<br>(57.1)         | na                    |               |   | 3 (1.6)                | 207<br>(73.1)         | 210<br>(44.5)         |
| other ICU            |               |     | na                    | 95<br>(19.2)          | na                    |               |   | na                     | 30<br>(10.6)          | 30<br>(6.4)           |
| REHA                 |               |     | na                    | 81<br>(16.4)          | na                    |               |   | na                     | 31<br>(11.0)          | 31<br>(6.6)           |

All values are reported as absolute numbers and percentages for categorical variables, and as median and interquartile ranges (IQR) if not distributed normally for continuous variables.

Abbreviations: BMI: body-mass-index (kg/m<sup>2</sup>); COPD: chronic-obstructive pulmonary disease; ICU: intensive care unit; LOS: length-of-stay; NIDDM: Non-insulin dependent diabetes mellitus; NOAC: novel oral anticoagulants; RASS: Richmond agitation sedation scale; SOFA score without GCS: sequential organ failure assessment score without Glasgow coma scale (GCS).

<sup>1</sup> Prior thrombotic events: e.g. deep vein thrombosis, pulmonary embolism.

<sup>2</sup> At ICU admission or first value after intubation at day of ICU admission.

**Supplemental Table E5: Clinical characteristics of patients who chose to discontinue ICU care; therapeutic interventions, clinical and laboratory parameters**

| Parameter                  | Total N | Missing N |           | All patients |
|----------------------------|---------|-----------|-----------|--------------|
| Total N (%)                |         |           |           | 107 (100.0)  |
| Age                        | 107     | 0         | Mean (SD) | 73.8 (10.1)  |
| Age groups                 | 107     | 0         |           |              |
| 18 – 29                    |         |           |           | 0 (0.0)      |
| 30 – 39 years              |         |           |           | 0 (0.0)      |
| 40 – 49 years              |         |           |           | 0 (0.0)      |
| 50 – 59 years              |         |           |           | 11 (10.3)    |
| 60 – 69 years              |         |           |           | 24 (22.4)    |
| 70 – 79 years              |         |           |           | 35 (32.7)    |
| 80 – 89 years              |         |           |           | 33 (30.8)    |
| 90 – 99 years              |         |           |           | 4 (3.7)      |
| Sex                        | 107     | 0         |           |              |
| female                     |         |           |           | 32 (29.9)    |
| male                       |         |           |           | 75 (70.1)    |
| BMI                        | 100     | 7         | Mean (SD) | 27.2 (5.8)   |
| BMI groups                 | 100     | 7         |           |              |
| below 20 kg/m <sup>2</sup> |         |           |           | 6 (6.0)      |
| 20 – 25 kg/m <sup>2</sup>  |         |           |           | 37 (37.0)    |
| 25 – 30 kg/m <sup>2</sup>  |         |           |           | 34 (34.0)    |
| above 30 kg/m <sup>2</sup> |         |           |           | 23 (23.0)    |

|                                   |     |    |           |
|-----------------------------------|-----|----|-----------|
| Blood group                       | 79  | 28 |           |
| 0                                 |     |    | 29 (36.7) |
| A                                 |     |    | 38 (48.1) |
| AB                                |     |    | 5 (6.3)   |
| B                                 |     |    | 7 (8.9)   |
| Arterial hypertension             | 107 | 0  | 78 (72.9) |
| Cardiovascular disease            | 107 | 0  | 34 (31.8) |
| Chronic arrhythmia                | 107 | 0  | 18 (16.8) |
| COPD                              | 107 | 0  | 8 (7.5)   |
| Other lung diseases               | 107 | 0  | 12 (11.2) |
| Nicotine abuse                    | 107 | 0  | 6 (5.6)   |
| History of solid organ transplant | 107 | 0  | 2 (1.9)   |
| History of bone marrow transplant | 107 | 0  | 1 (0.9)   |
| Alcoholism                        | 107 | 0  | 3 (2.8)   |
| Chronic kidney failure            | 107 | 0  | 20 (18.7) |
| Diabetes mellitus                 | 107 | 0  | 29 (27.1) |
| NIDDM                             | 107 | 0  | 18 (16.8) |
| Prior thrombotic events           | 107 | 0  | 10 (9.3)  |
| ACE inhibitors                    | 107 | 0  | 32 (29.9) |
| AT2 receptor blocker              | 107 | 0  | 15 (14.0) |
| Beta blockers                     | 107 | 0  | 43 (40.2) |
| Anti-platelet medication          | 107 | 0  | 39 (36.4) |

|                                                                       |     |    |              |                  |
|-----------------------------------------------------------------------|-----|----|--------------|------------------|
| Novel oral anticoagulants (NOAC)                                      | 107 | 0  |              | 11 (10.3)        |
| Corticoids                                                            | 107 | 0  |              | 8 (7.5)          |
| Immunosuppressive drugs                                               | 107 | 0  |              | 6 (5.6)          |
| Opioids                                                               | 107 | 0  |              | 7 (6.5)          |
| Admission/Transfer status                                             | 107 | 0  |              |                  |
| External Transfer                                                     |     |    |              | 37 (34.6)        |
| Internal Admission                                                    |     |    |              | 70 (65.4)        |
| Ventilatory status at admission                                       | 107 | 0  |              |                  |
| Intubated                                                             |     |    |              | 39 (36.4)        |
| Non-invasive assisted ventilation                                     |     |    |              | 15 (14.0)        |
| spontaneous breathing                                                 |     |    |              | 53 (49.5)        |
| Prior days of non-invasive ventilation                                | 90  | 17 | Median (IQR) | 0.0 (0.0 to 0.0) |
| Prior days of invasive ventilation                                    | 96  | 11 | Median (IQR) | 0.0 (0.0 to 0.0) |
| RASS                                                                  | 105 | 2  | Median (IQR) | 0 (-5 to 0)      |
| SOFA (w/o GCS)                                                        | 107 | 0  | Median (IQR) | 6.0 (4.0 to 8.0) |
| Murray Lung Injury Score                                              | 106 | 1  | Median (IQR) | 3.1 (2.3 to 3.5) |
| ARDS grading according to PaO <sub>2</sub> /FiO <sub>2</sub> Quotient | 59  | 0  |              |                  |
| no ARDS                                                               |     |    |              | 13 (12.1)        |
| PaO <sub>2</sub> /FiO <sub>2</sub> > 300                              |     |    |              |                  |
| Mild                                                                  |     |    |              | 17 (15.9)        |
| PaO <sub>2</sub> /FiO <sub>2</sub> 201-300                            |     |    |              |                  |
| Moderate                                                              |     |    |              | 45 (42.1)        |
| PaO <sub>2</sub> /FiO <sub>2</sub> 101-200                            |     |    |              |                  |
| Severe                                                                |     |    |              | 32 (29.9)        |
| PaO <sub>2</sub> /FiO <sub>2</sub> < 100                              |     |    |              |                  |



|                                                |     |    |              |                        |
|------------------------------------------------|-----|----|--------------|------------------------|
| Static compliance (ml/mbar)                    | 56  | 51 | Mean (SD)    | 33.4 (15.6)            |
| Driving pressure (mbar)                        | 56  | 51 | Mean (SD)    | 13.4 (4.2)             |
| Hemoglobin (g/dl)                              | 105 | 2  | Mean (SD)    | 11.2 (2.4)             |
| Platelets (x10 <sup>3</sup> µl <sup>-1</sup> ) | 105 | 2  | Median (IQR) | 199.0 (138.0 to 277.0) |
| Leucocytes (n/nl)                              | 104 | 3  | Median (IQR) | 9.7 (6.8 to 13.6)      |
| Lymphocytes (n/nl)                             | 83  | 24 | Median (IQR) | 0.6 (0.5 to 1.0)       |
| Neutrophiles (n/nl)                            | 82  | 25 | Mean (SD)    | 8.6 (4.5)              |
| Platelet/neutrophile ratio                     | 82  | 25 | Median (IQR) | 27.1 (18.2 to 37.3)    |
| Platelet/lymphocyte ratio                      | 82  | 25 | Median (IQR) | 305.4 (175.3 to 491.4) |
| C-reactive protein (mg/dl)                     | 100 | 7  | Median (IQR) | 13.4 (7.3 to 23.4)     |
| Procalcitonin (ng/ml)                          | 102 | 5  | Median (IQR) | 0.4 (0.1 to 1.9)       |
| Interleukin-6 (pg/ml)                          | 68  | 39 | Median (IQR) | 119.0 (39.6 to 408.8)  |
| Ferritin (µg/dl)                               | 58  | 49 | Median (IQR) | 108.3 (59.8 to 210.7)  |
| D-Dimer (µg/ml)                                | 84  | 23 | Median (IQR) | 4.1 (1.5 to 8.6)       |
| Total bilirubin (mg/dl)                        | 104 | 3  | Median (IQR) | 0.6 (0.4 to 0.9)       |
| Creatinine (mg/dl)                             | 105 | 2  | Median (IQR) | 1.2 (0.8 to 1.9)       |
| LOS ICU (days)                                 |     |    |              | 15.0 (7.0 to 24.0)     |
| ICU discharge status                           | 107 | 0  | non-survival | 95 (88.8)              |

ARDS: acquired respiratory distress syndrome, grading according to Berlin definition; BMI: body-mass-index (kg/m<sup>2</sup>); COPD: chronic-obstructive pulmonary disease; ICU: intensive care unit; LOS: length-of-stay; NIDDM: Non-insulin dependent diabetes mellitus; NOAC: novel oral anticoagulants; RASS: Richmond agitation sedation scale; SOFA score without GCS: sequential organ failure assessment score without Glasgow coma scale (GCS).

<sup>1</sup> Prior thrombotic events: e.g. deep vein thrombosis, pulmonary embolism.

**Supplemental Table E6: Respiratory therapy and organ failure support in ICU patients**

| Parameter                                                    | Retrospective cohort |           |                    |                | Prospective cohort |           |                  |                   |
|--------------------------------------------------------------|----------------------|-----------|--------------------|----------------|--------------------|-----------|------------------|-------------------|
|                                                              | Total N              | Missing N | non-survival       | survival       | Total N            | Missing N | non-survival     | survival          |
| Total N (%)                                                  |                      |           | 214<br>(30.0)      | 499<br>(70.0)  |                    |           | 189<br>(40.0)    | 284<br>(60.0)     |
| Intubation and mechanical ventilation during ICU stay        | 713                  | 0         | 194<br>(90.7)      | 369<br>(73.9)  | 473                | 0         | 184<br>(97.4)    | 156<br>(54.9)     |
| Reason for intubation                                        | 713                  | 0         |                    |                | 473                | 0         |                  |                   |
| Hypoxemia                                                    |                      |           | 176<br>(82.2)      | 331<br>(66.3)  |                    |           | 158<br>(83.6)    | 133<br>(46.8)     |
| Hypercapnia                                                  |                      |           | 44 (20.6)          | 81<br>(16.2)   |                    |           | 37<br>(19.6)     | 23 (8.1)          |
| Dyspnea                                                      |                      |           | 81 (37.9)          | 143<br>(28.7)  |                    |           | 33<br>(17.5)     | 31<br>(10.9)      |
| Fatigue                                                      |                      |           | 60 (28.0)          | 103<br>(20.6)  |                    |           | 59<br>(31.2)     | 36<br>(12.7)      |
| Public health indication (e.g. prevention of aerosol spread) |                      |           | 31 (14.5)          | 39 (7.8)       |                    |           | n/a              | 1 (0.4)           |
| Prone positioning                                            | 713                  | 0         | 154<br>(72.0)      | 270<br>(54.1)  | 473                | 0         | 158<br>(83.6)    | 125<br>(44.0)     |
| Tracheostomy                                                 | 713                  | 0         | 81 (37.9)          | 198<br>(39.7)  | 473                | 0         | 58<br>(30.7)     | 80<br>(28.2)      |
| Duration of invasive ventilation (days)                      | 564                  | 149       | 15.0<br>(22.0)     | 18.0<br>(24.5) | 340                | 133       | 16.0<br>(14.0)   | 18.0<br>(29.0)    |
| Duration of non-invasive ventilation (days)                  | 213                  | 500       | 1.5 (2.0)          | 4.0 (5.0)      | 200                | 273       | 3.0 (4.0)        | 5.0 (7.0)         |
| ECMO therapy                                                 | 713                  | 0         | 83 (38.8)          | 67<br>(13.4)   | 473                | 0         | 86<br>(45.5)     | 25 (8.8)          |
| duration (days)                                              |                      |           | 11.5 (5.8 to 23.5) | 16 (10 to 29)  |                    |           | 18 (9.5 to 25.5) | 17 (11.3 to 25.3) |
| CRRT or dialysis                                             | 713                  | 0         | 149<br>(69.6)      | 160<br>(32.1)  | 473                | 0         | 125<br>(66.1)    | 48<br>(16.9)      |
| Convalescent plasma therapy                                  | 627                  | 86        | 7 (3.6)            | 5 (1.1)        | 448                | 25        | 9 (5.0)          | 7 (2.6)           |
| Pulmonary embolism                                           | 713                  | 0         | 30 (14.0)          | 27 (5.4)       | 473                | 0         | 22<br>(11.6)     | 24 (8.5)          |

|                                         |     |   |               |               |     |   |               |               |
|-----------------------------------------|-----|---|---------------|---------------|-----|---|---------------|---------------|
| Bacterial superinfection with pneumonia | 713 | 0 | 127<br>(59.3) | 217<br>(43.5) | 473 | 0 | 100<br>(52.9) | 85<br>(29.9)  |
| Antibiotic therapy                      | 713 | 0 | 204<br>(95.3) | 410<br>(82.2) | 473 | 0 | 167<br>(88.4) | 187<br>(65.8) |
| Therapeutic dose unfractionated heparin | 713 | 0 | 143<br>(66.8) | 256<br>(51.3) | 473 | 0 | 151<br>(79.9) | 135<br>(47.5) |
| Therapeutic dose argatroban             | 713 | 0 | 30 (14.0)     | 62<br>(12.4)  | 473 | 0 | 27<br>(14.3)  | 35<br>(12.3)  |
| Intravenous corticosteroids             | 713 | 0 | 108<br>(50.5) | 107<br>(21.4) | 473 | 0 | 169<br>(89.4) | 220<br>(77.5) |

All values are reported as median and interquartile ranges.

Abbreviations: BMI: body-mass-index (kg/m<sup>2</sup>); CRRT: continuous renal replacement therapy; ECMO: extracorporeal membrane oxygenation; ICU: intensive care unit; LOS: length-of-stay; n/a not available.

## Supplemental Table E7: Description of the machine learning process

### Software used for the machine learning process and for visualization.

ML was performed in python (version 3.8.5) with jupyter notebook (jupyter-core 4.63 and jupyter notebook 6.1.5) and pandas (version 1.1.4) [1]. Standard implementations from scikit-learn (version 0.23.2) were used for Random Forest, Support-Vector-Classifier (SVC), and Cross-Validation (CV) [2]. For the EBM, we used Microsoft's open source implementation interpretML (Microsoft Corporation, Redmond, USA, version 0.2.4) [3]. For the visualization of the PR-AUC curves we used matplotlib (version 3.3.3). For all other visualizations, we used R (version 4.0.3) within RStudio (version 1.3.1093); tidyverse (version 1.3.0), latex2exp (version 0.4.0), ggpubr (version 0.4.0), patchwork (version 1.1.0), for the generation of tables finalfit (version 1.0.2), for Kaplan-Meier-Curves finalfit, survminer (version 0.4.8), and survival (version 3.2.7).

### Variable representation

We transformed the following laboratory values to their  $\log_{10}(x+1)$ -scale (based on visual inspection) prior to their use as ML variables: lymphocytes, leucocytes, neutrophils, creatinine, procalcitonin, d-dimers, IL-6, ferritin, platelets, platelets/neutrophils ratio, platelets/lymphocytes ratio, bilirubin.

### Variables excluded from the ML process due to more than 30% missing data

PEEP at admission

Compliance and Driving pressure at admission

Blood group

Ferritin at admission

**Supplemental Table E8: Variables used for the ML models**

|                                        |
|----------------------------------------|
| <b>ML “admission” model</b>            |
| Age                                    |
| Sex                                    |
| Admission/Transfer status              |
| Admission from                         |
| Height                                 |
| Weight                                 |
| BMI                                    |
| Arterial Hypertension                  |
| Cardiovascular Disease                 |
| Chronic arrhythmia                     |
| COPD                                   |
| Other lung disease                     |
| Nicotine                               |
| H/O Solid Organ Transplant             |
| H/O Bone Marrow Transplant             |
| Alcoholism                             |
| Chronic kidney failure                 |
| Chronic dialysis                       |
| Diabetes mellitus                      |
| NIDDM                                  |
| Prior thrombotic events                |
| ACE inhibitors                         |
| AT2 receptor blocker                   |
| Beta blockers                          |
| Anti-platelet medication               |
| NOAC                                   |
| Corticoids                             |
| Immunosuppressive drugs                |
| Opioids                                |
| Breathing status                       |
| Alveolar consolidation (quadrants,CXR) |
| Hypotension according to SOFA grading  |
| Platelets                              |
| Total bilirubin                        |
| Creatinine                             |
| Murray lung injury score               |
| SOFA score w/o GCS                     |
| Procalcitonin                          |
| Interleukin-6                          |
| Hemoglobin                             |
| D-Dimer                                |
| Prior days of invasive ventilation     |
| Platelet/lymphocyte ratio              |
| Platelet/neutrophile ratio             |
| PaO2/FiO2 quotient at admission        |

|                        |
|------------------------|
| Leucocytes             |
| Lymphocytes (absolute) |
| Neutrophils (absolute) |
| C-reactive protein     |

**Supplemental Table E9: Overall performance of the machine learning models for ICU outcome prediction**

a) Retrospective cohort

| <b>Prediction variable</b> | <b>ICU survival</b> |        | <b>ECMO therapy</b> |        | <b>Renal Replacement Therapy</b> |        |
|----------------------------|---------------------|--------|---------------------|--------|----------------------------------|--------|
|                            | N=596               |        | N=596               |        | N=572                            |        |
| <b>ML model</b>            | Balanced accuracy   | PR-AUC | Balanced accuracy   | PR-AUC | Balanced accuracy                | PR-AUC |
| RF                         | 0.6                 | 0.85   | 0.66                | 0.47   | 0.71                             | 0.72   |
| SVC                        | 0.64                | 0.83   | 0.71                | 0.48   | 0.7                              | 0.71   |
| EBM                        | 0.57                |        | 0.61                |        | 0.7                              |        |
| EBM (10 interactions)      | 0.61                | 0.83   | 0.66                | 0.48   | 0.69                             | 0.8    |

b) Prospective cohort

| <b>Prediction variable</b> | <b>ICU survival</b> |        | <b>ECMO therapy</b> |        | <b>Renal Replacement Therapy</b> |        |
|----------------------------|---------------------|--------|---------------------|--------|----------------------------------|--------|
|                            | N=443               |        | N=443               |        | N=428                            |        |
| <b>ML model</b>            | Balanced accuracy   | PR-AUC | Balanced accuracy   | PR-AUC | Balanced accuracy                | PR-AUC |
| RF                         | 0.6                 | 0.88   | 0.6                 | 0.93   | 0.69                             | 0.48   |
| SVC                        | 0.67                | 0.78   | 0.79                | 0.83   | 0.66                             | 0.52   |
| EBM                        | 0.58                |        | 0.55                |        | 0.69                             |        |
| EBM (10 interactions)      | 0.58                | 0.89   | 0.61                | 0.93   | 0.69                             | 0.54   |

**Supplemental Figure E1: Map illustrating location of participating centers in Germany**

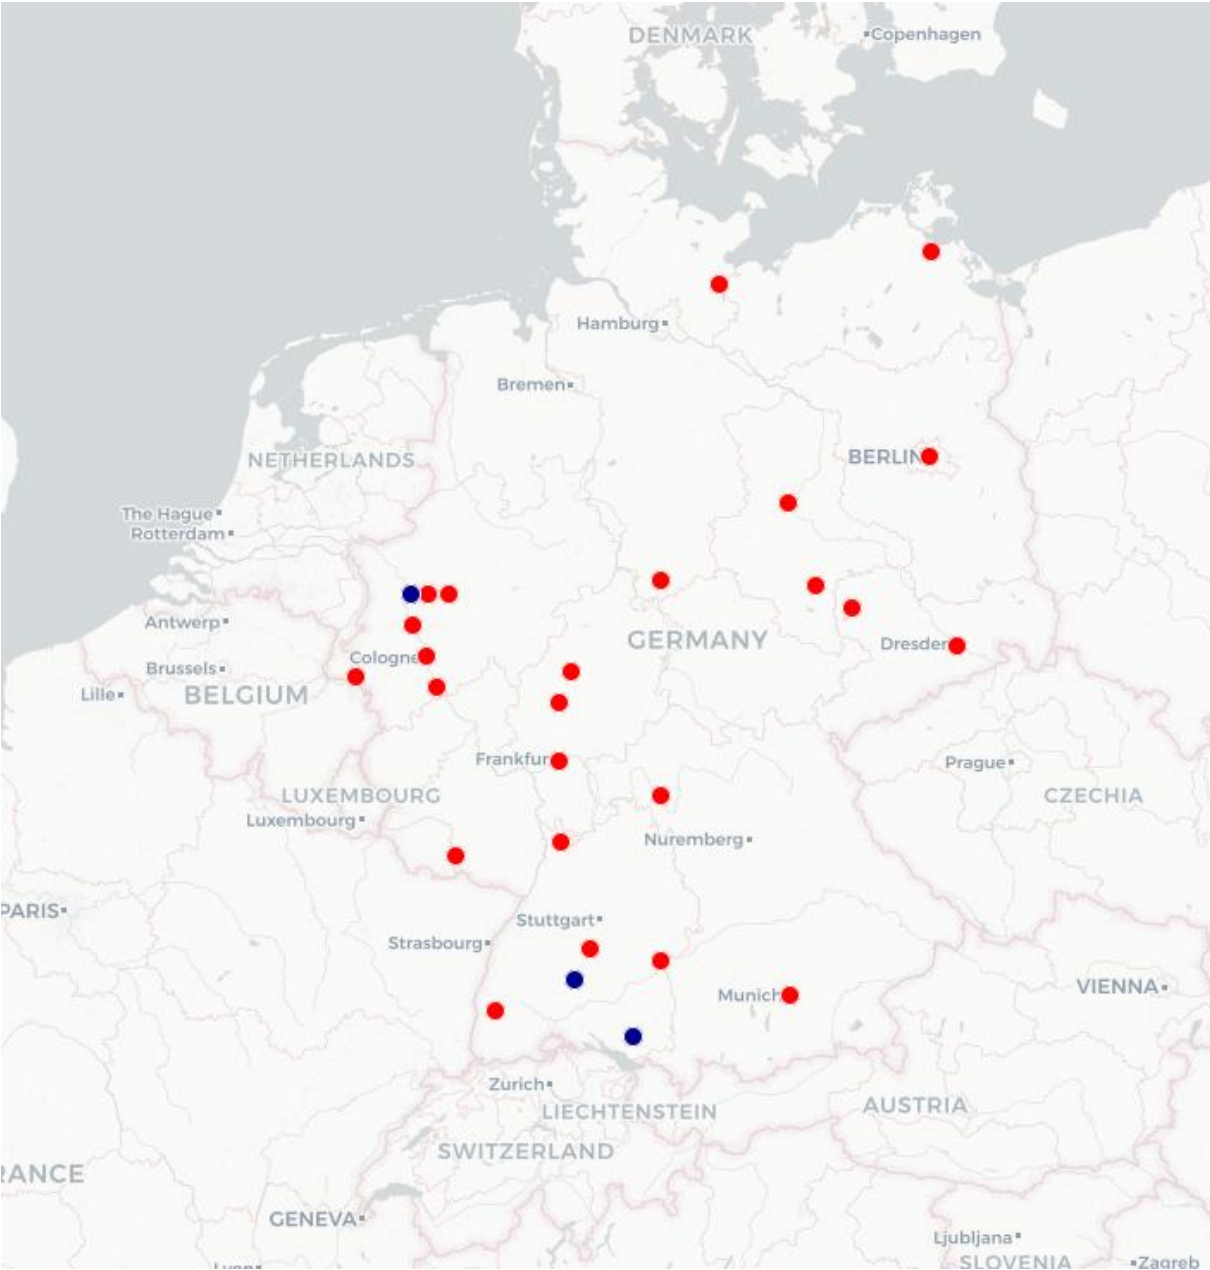

Map tiles by [CartoDB](#), under [CC BY 3.0](#). map data © [OpenStreetMap contributors](#) under [ODbL](#)

**Red dots:** Participating tertiary care university hospitals

**Blue dots:** Participating primary and secondary care hospitals



**Supplemental Figure E2: Patient selection chart**

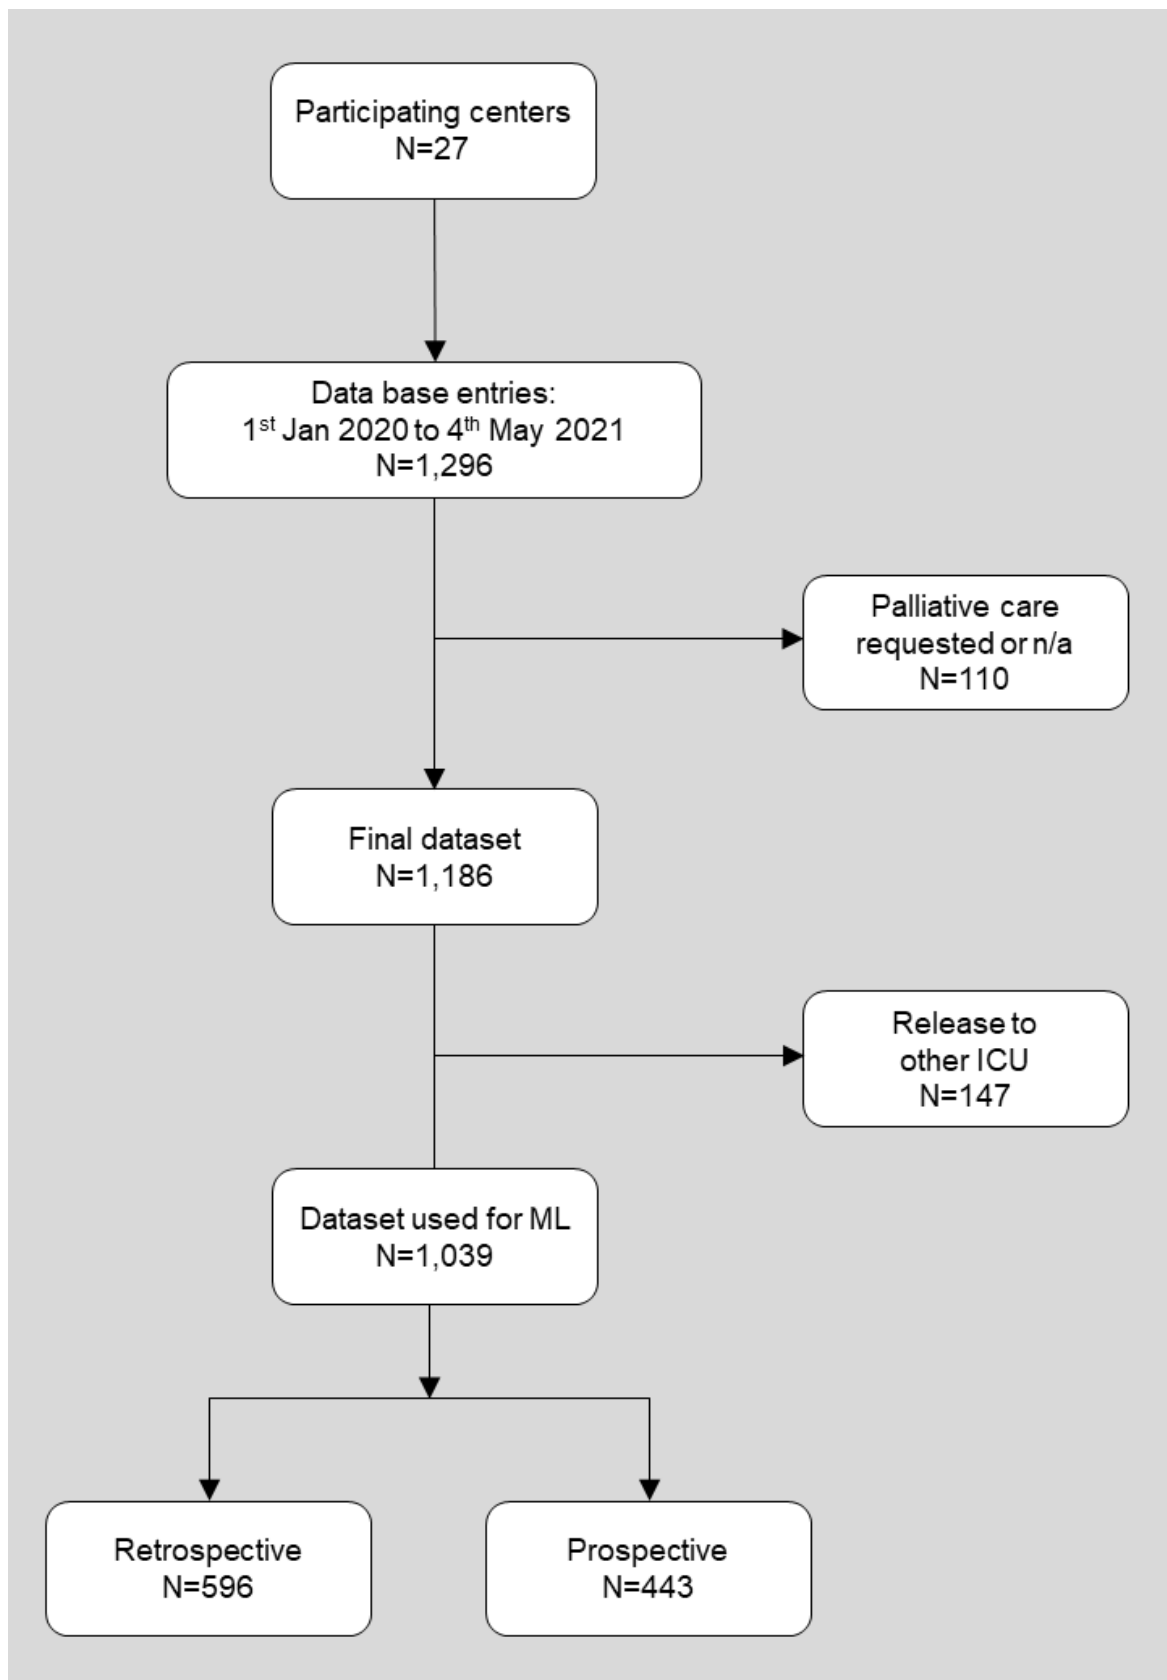

Abbreviations: ML machine learning; n/a not available.

### Supplemental Figure E3: Kaplan Meier Curves for probability of ICU survival

#### a) ICU survival according to age groups

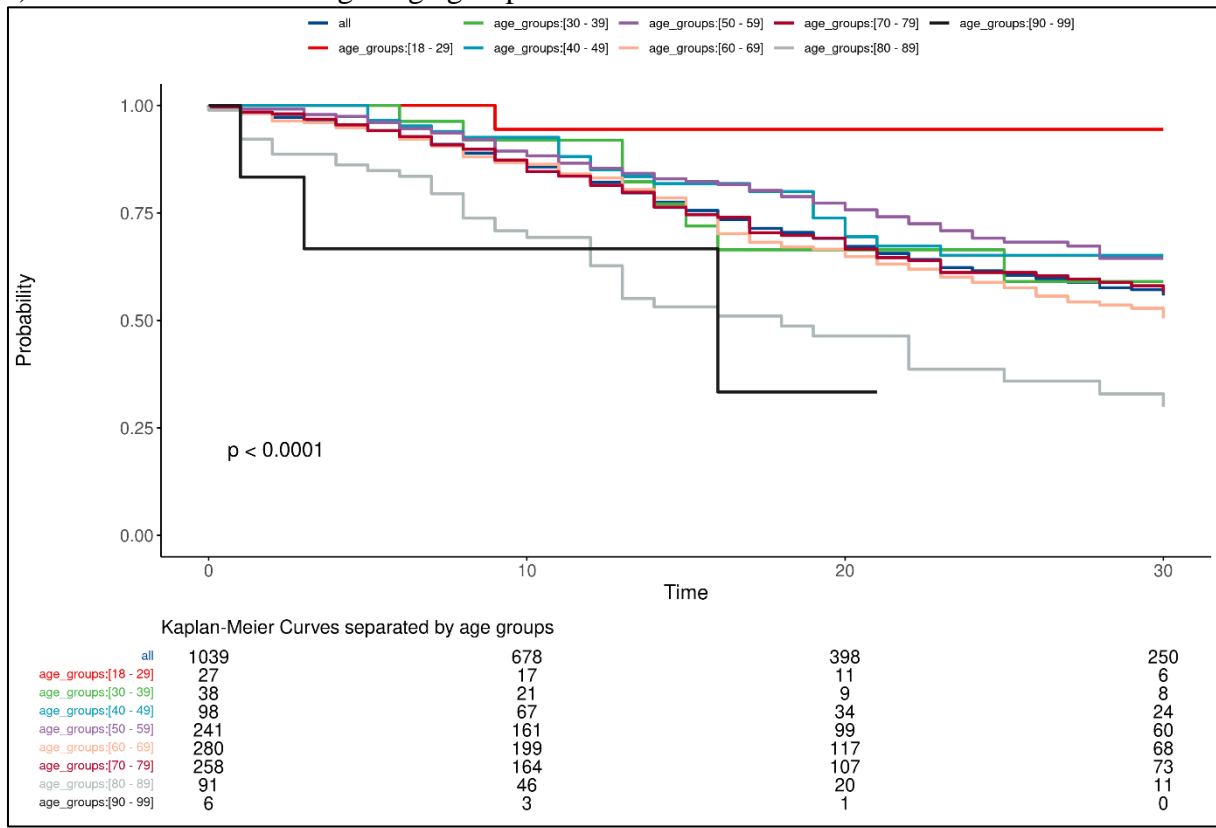

#### b) ICU survival according to ARDS severity

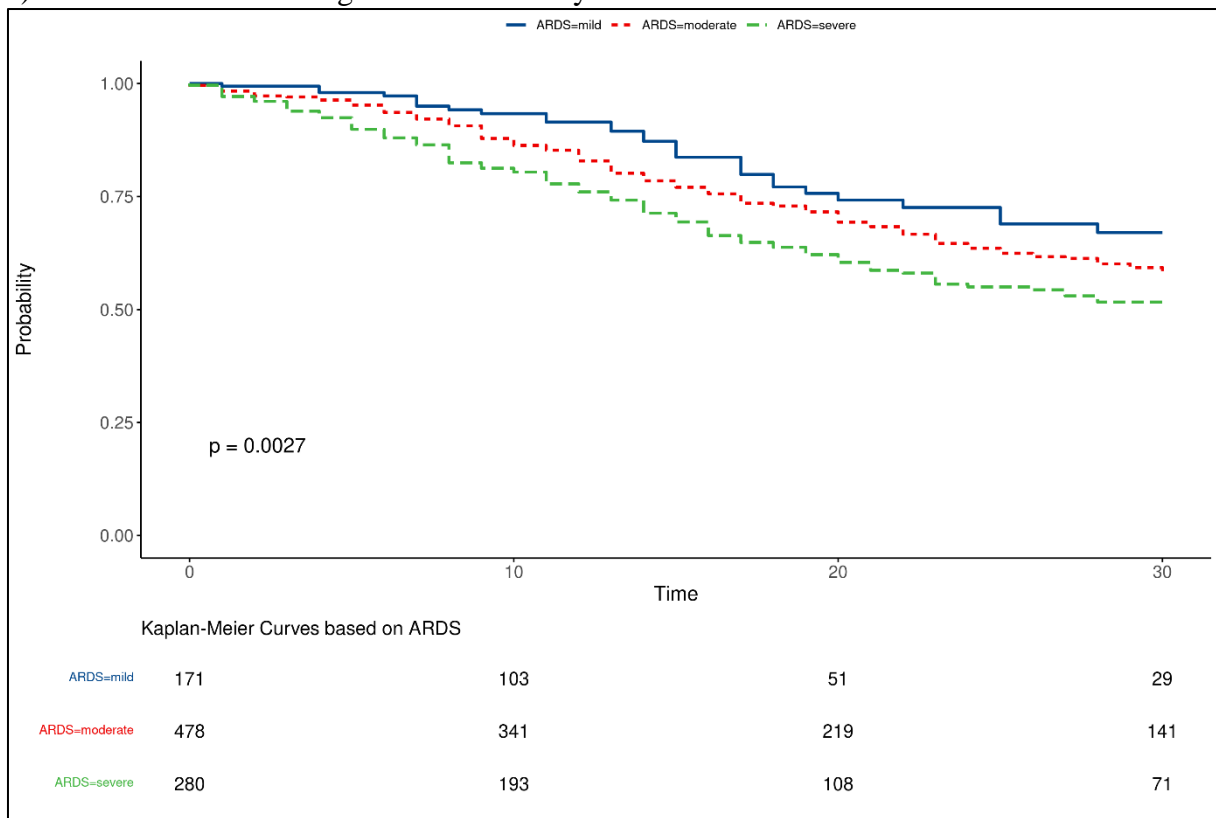

### Supplemental Figure E4: PR-AUC curve for the EBM models (complete dataset)

a) EBM model (10-interactions) for prediction of ICU survival

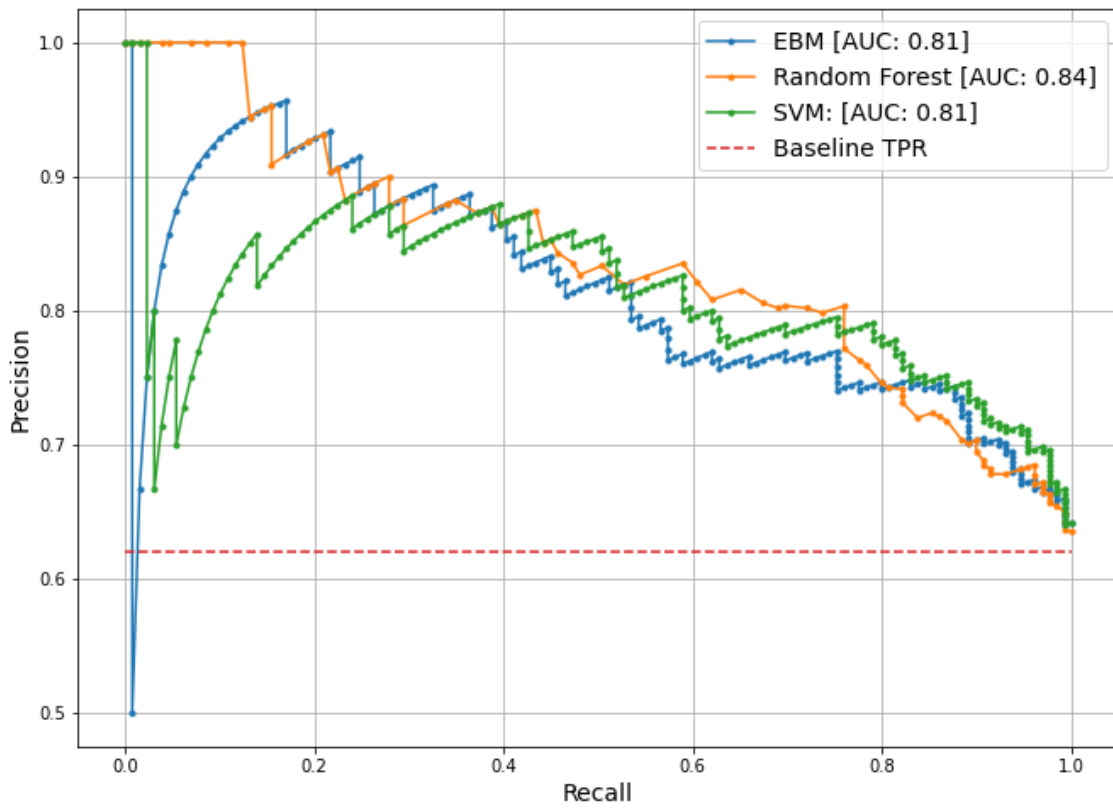

b) EBM model (10-interactions) for prediction of ECMO therapy

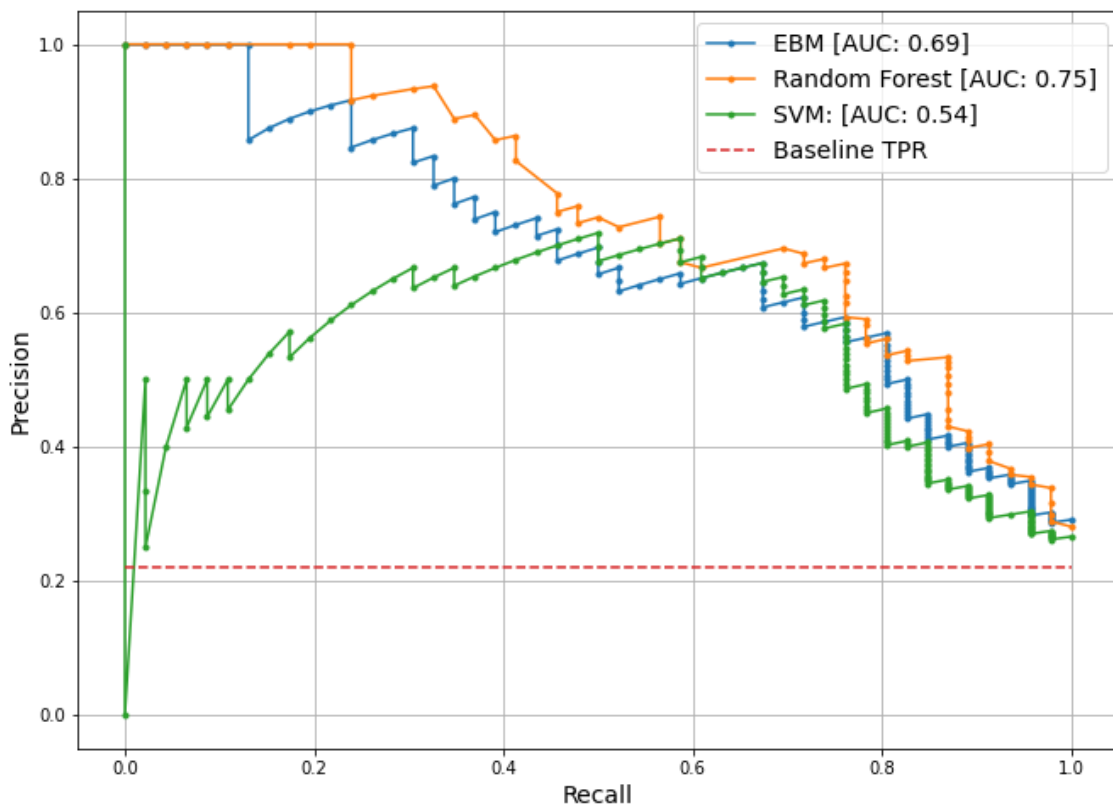

c) EBM model (10-interactions) for prediction of renal replacement therapy during ICU stay

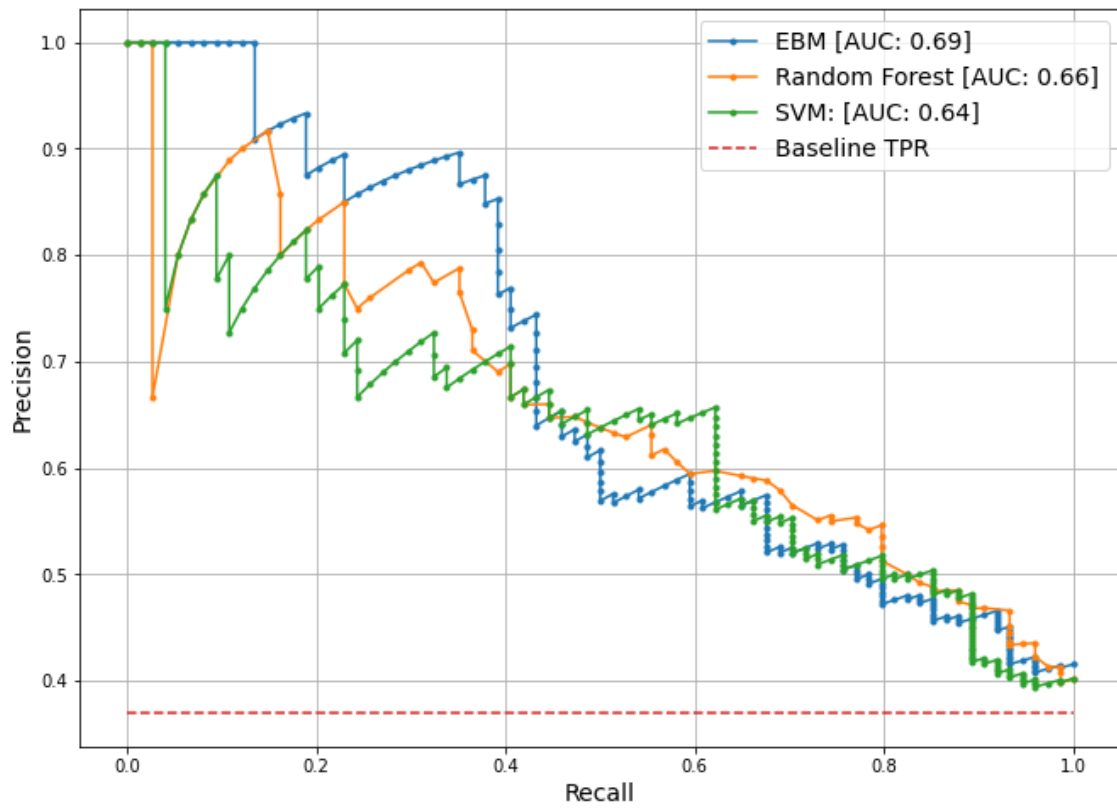

## Supplemental Figure E5: Comparison of shape functions of 5 selected variables of the EBM model for the prediction of “ICU survival” using the different datasets out of the 20 most important variables

a) EBM model (10-interactions) for prediction of ICU survival

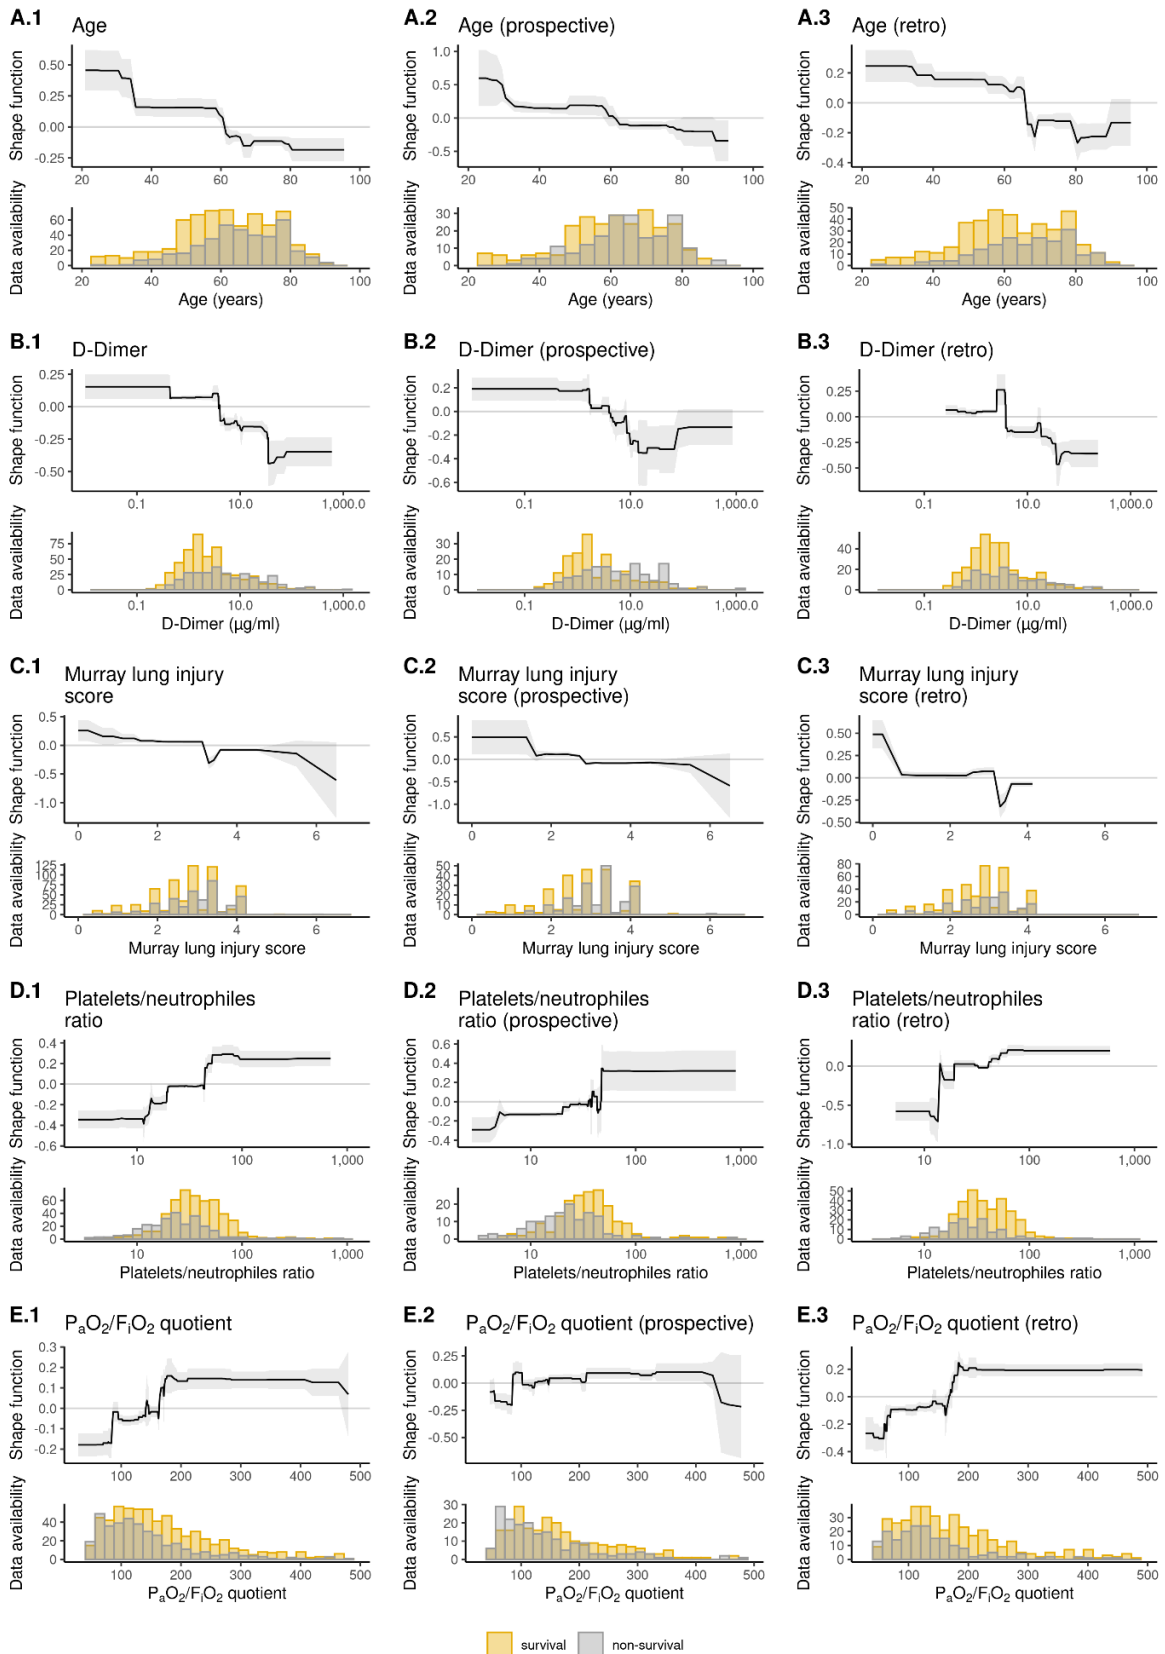

b) EBM model (10-interactions) for prediction of ECMO therapy

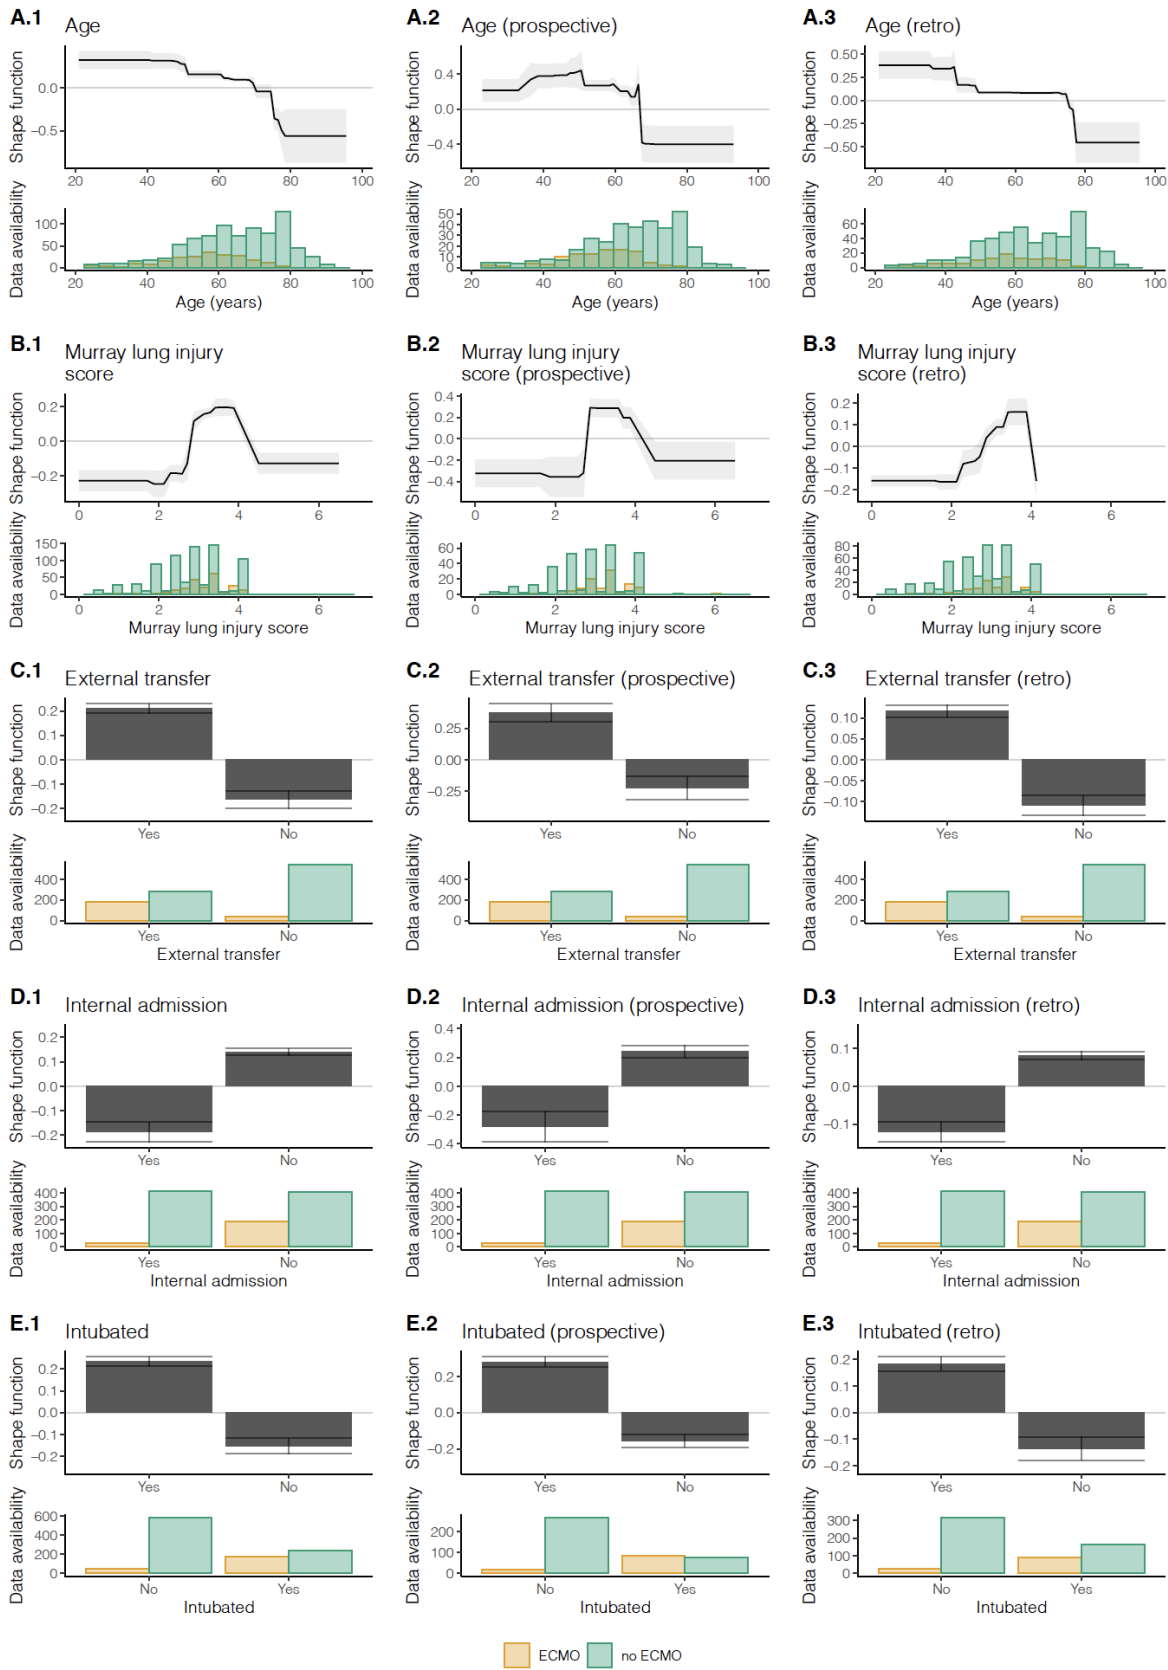

c) EBM model (10-interactions) for prediction of renal replacement therapy during ICU stay

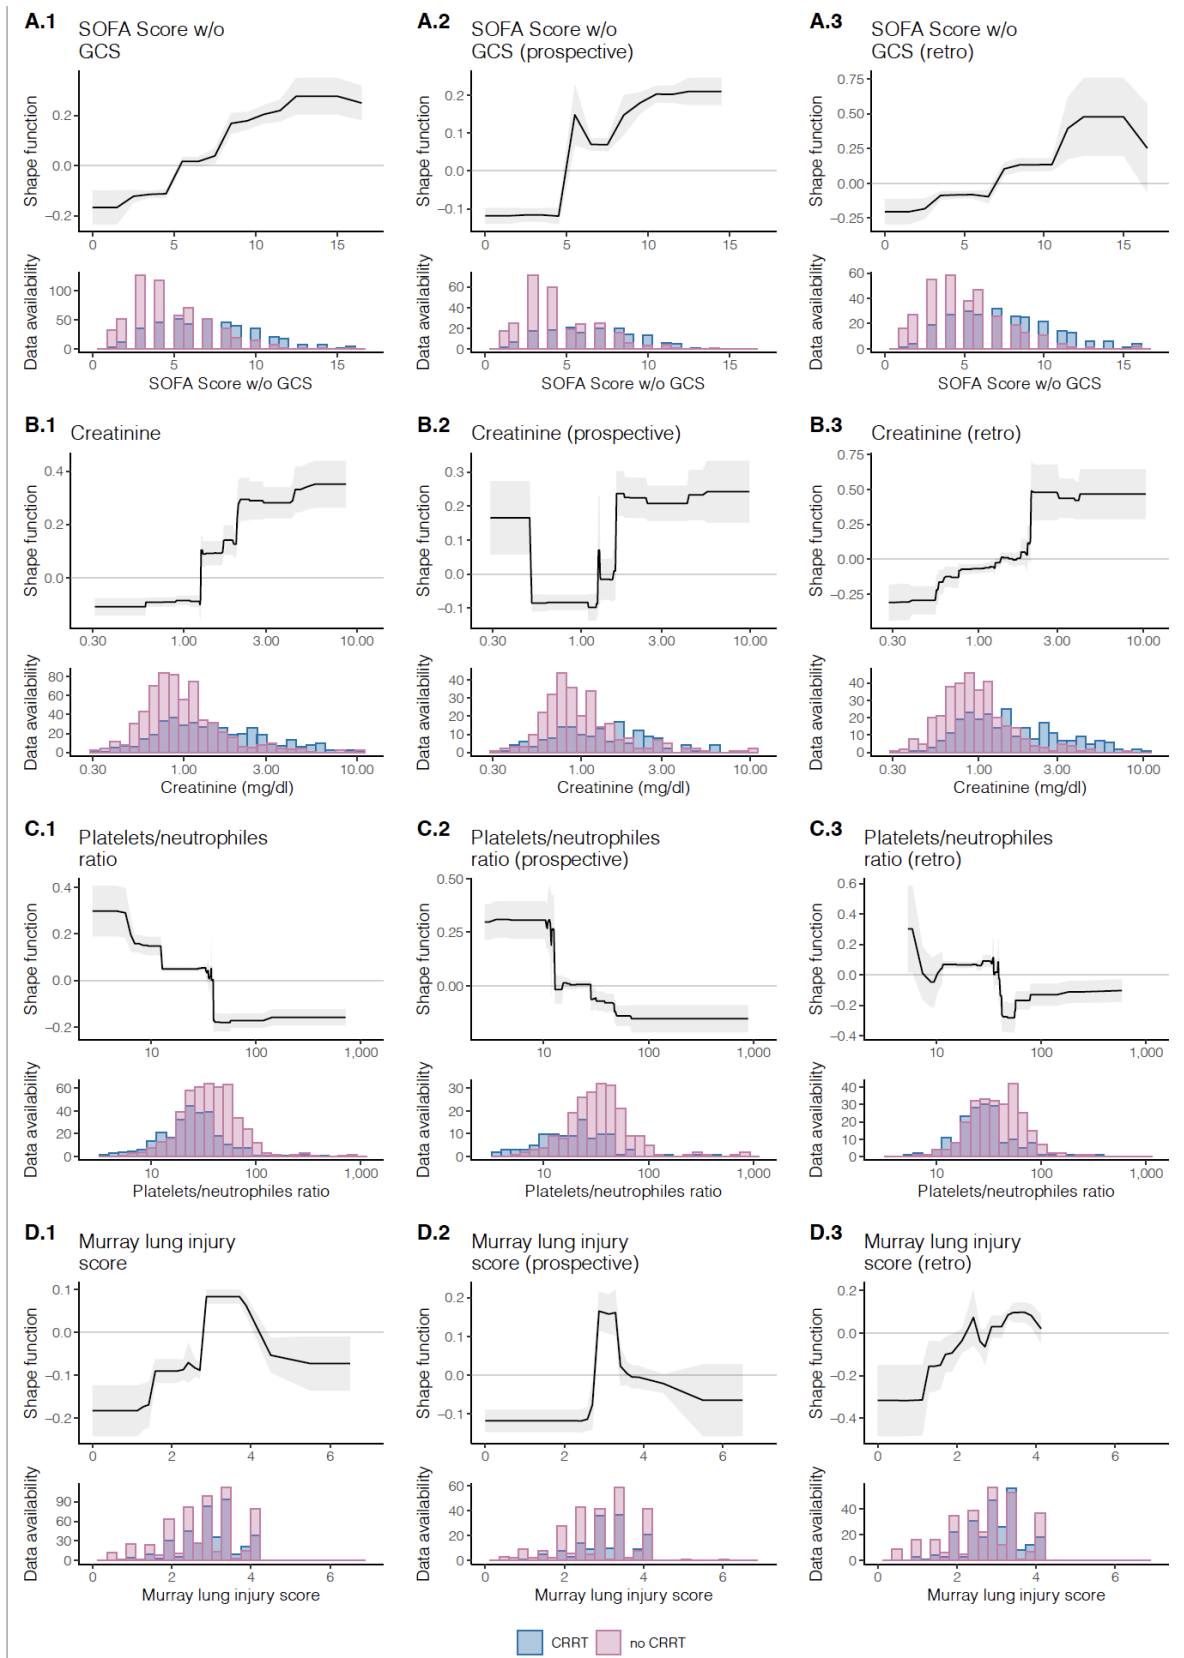

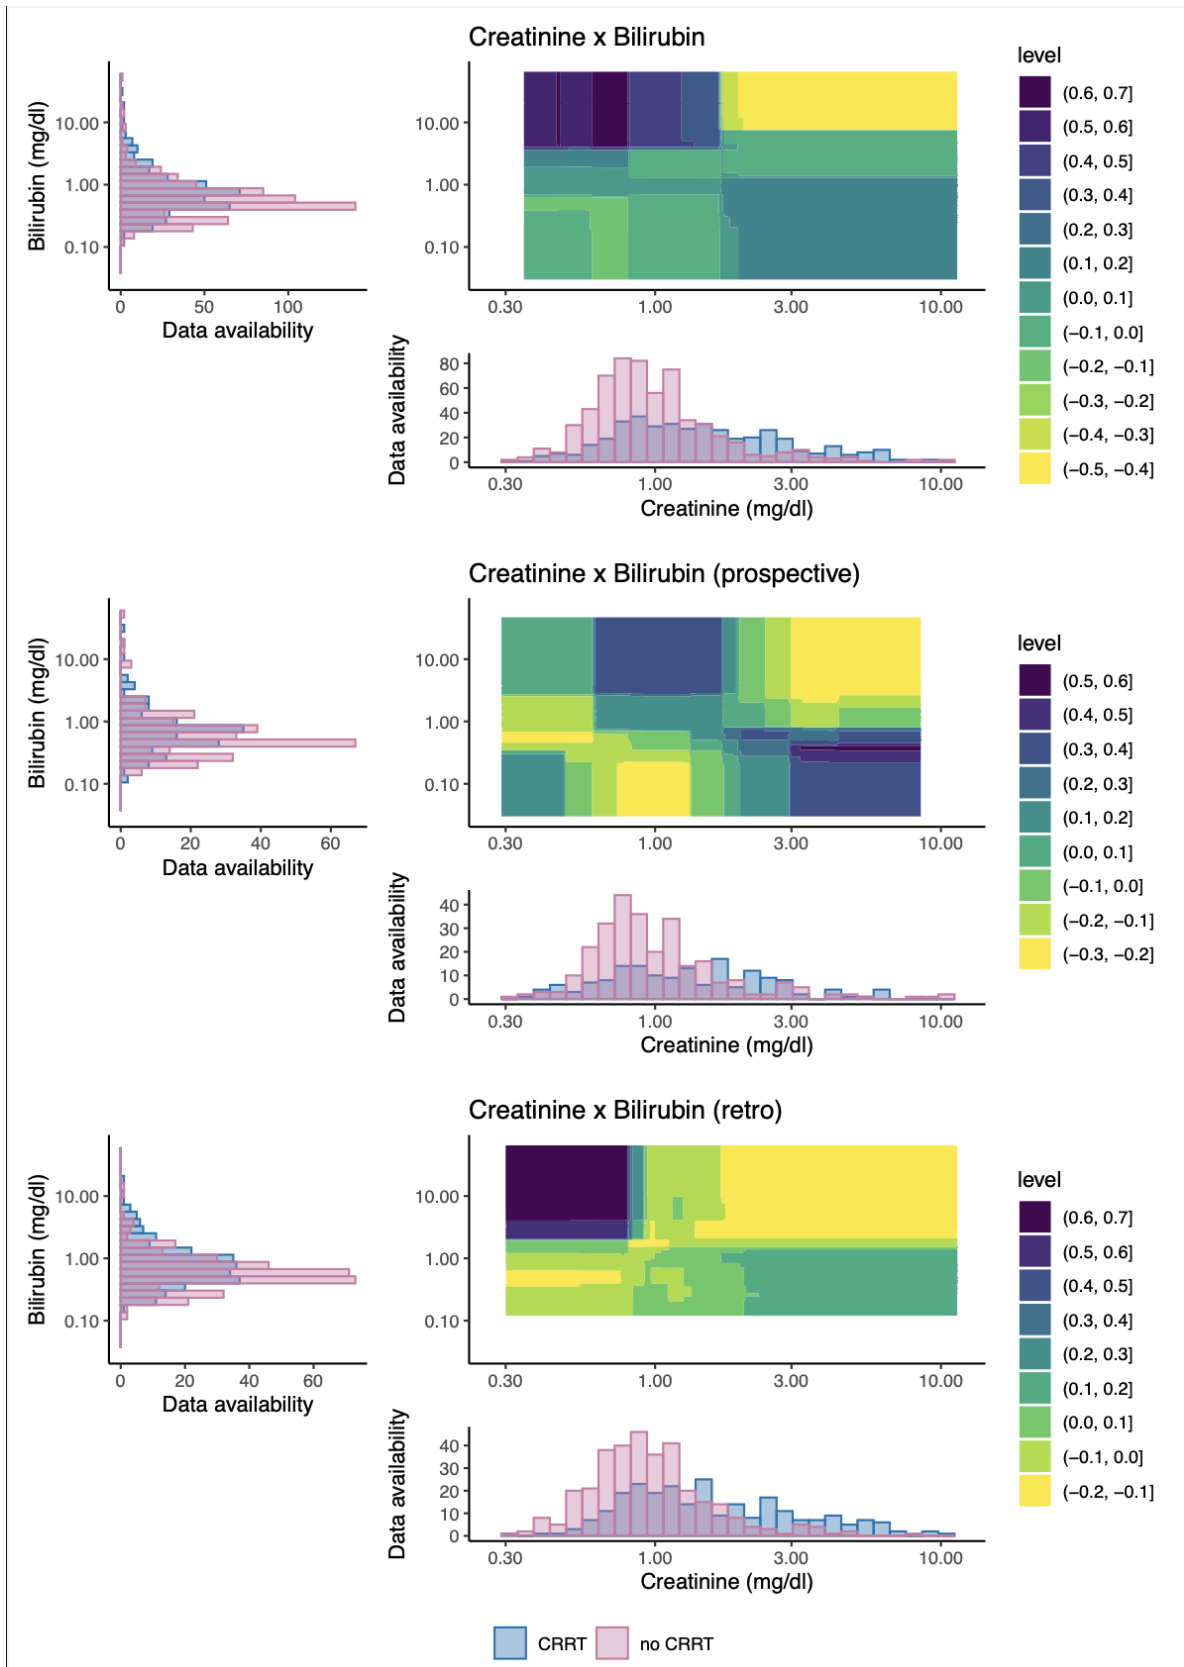



## References

1. team Tpd: **pandas-dev/pandas: Pandas**. In.: Zenodo; 2020.
2. Pedregosa F, Varoquaux G, Gramfort A, Michel V, Thirion B, Grisel O, Blondel M, Prettenhofer P, Weiss R, Dubourg V *et al*: **Scikit-learn: Machine Learning in Python**. *J Mach Learn Res* 2011, **12**(null):2825–2830.
3. Caruana HNaSJaPKaR: **InterpretML: A Unified Framework for Machine Learning Interpretability**. In.; 2019.
